# Supplementary material
Source: PubMed Central journal article supplement (PMC6999491)
Supplement: ELSC-18-132-s001.pdf [file ELSC-18-132-s001.pdf]

Supplemental Data

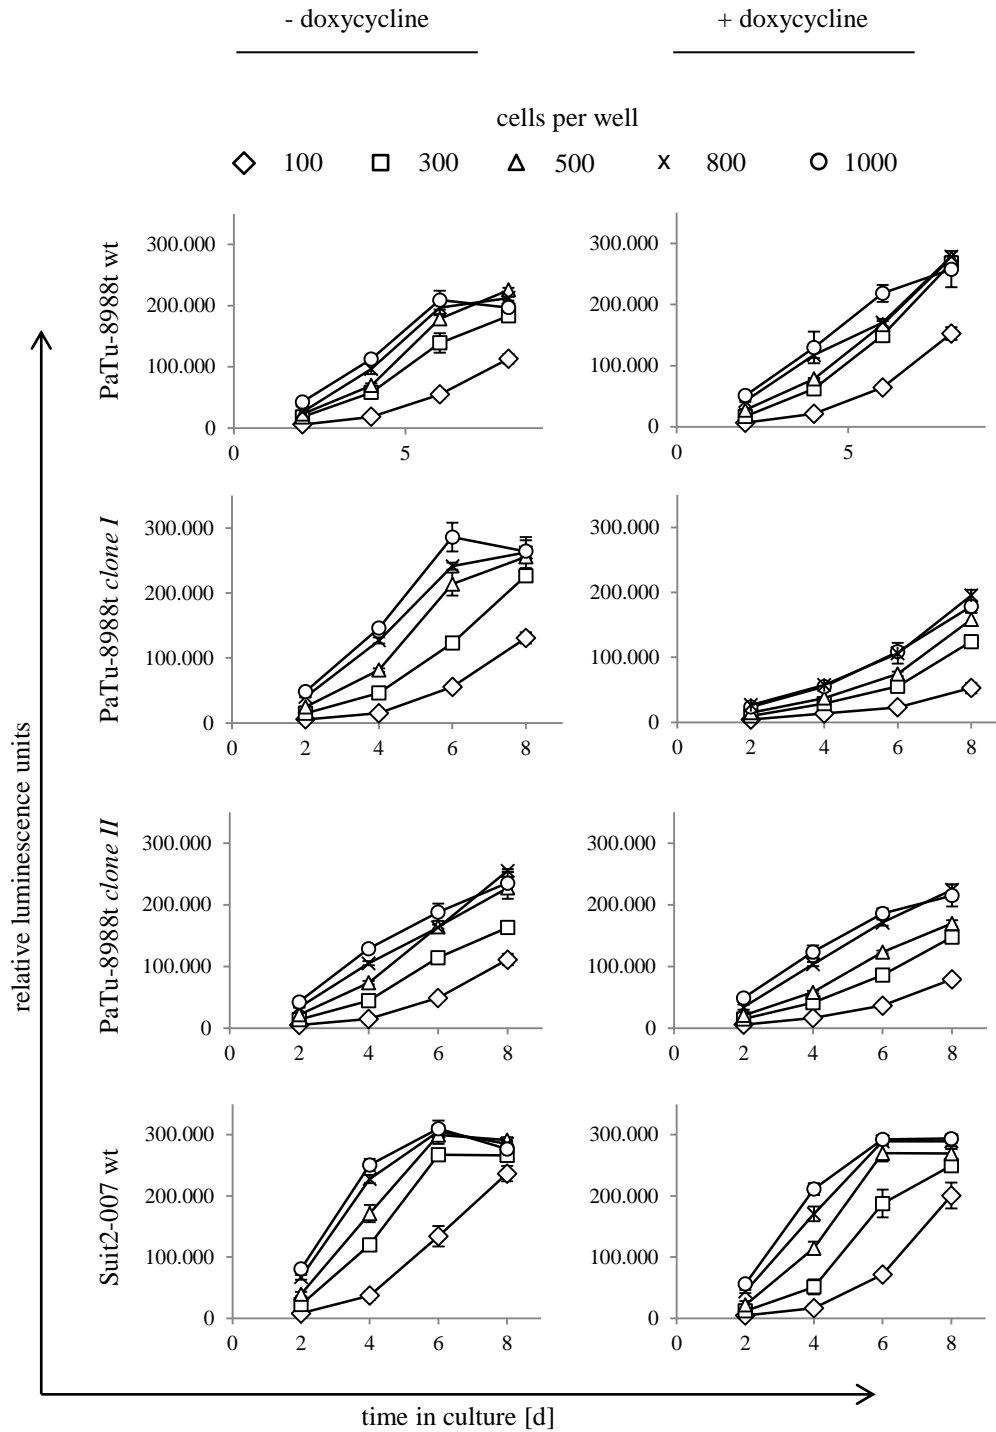

Fig. S1: Growth kinetics of different PDAC cell lines w/o doxycycline using the LO-method. Different cell counts ( $\diamond$  - 100,  $\square$  - 300,  $\triangle$  - 500,  $\times$  - 800,  $\circ$  - 1000) were seeded per well and CellTiterGlo<sup>®</sup> 3D assays were performed on day 2, 4, 6 and 8 after seeding. Relative luminescence intensities were plotted against time. Data are depicted as mean  $\pm$  SD from one experiment with 4 samples per cell count and time point.

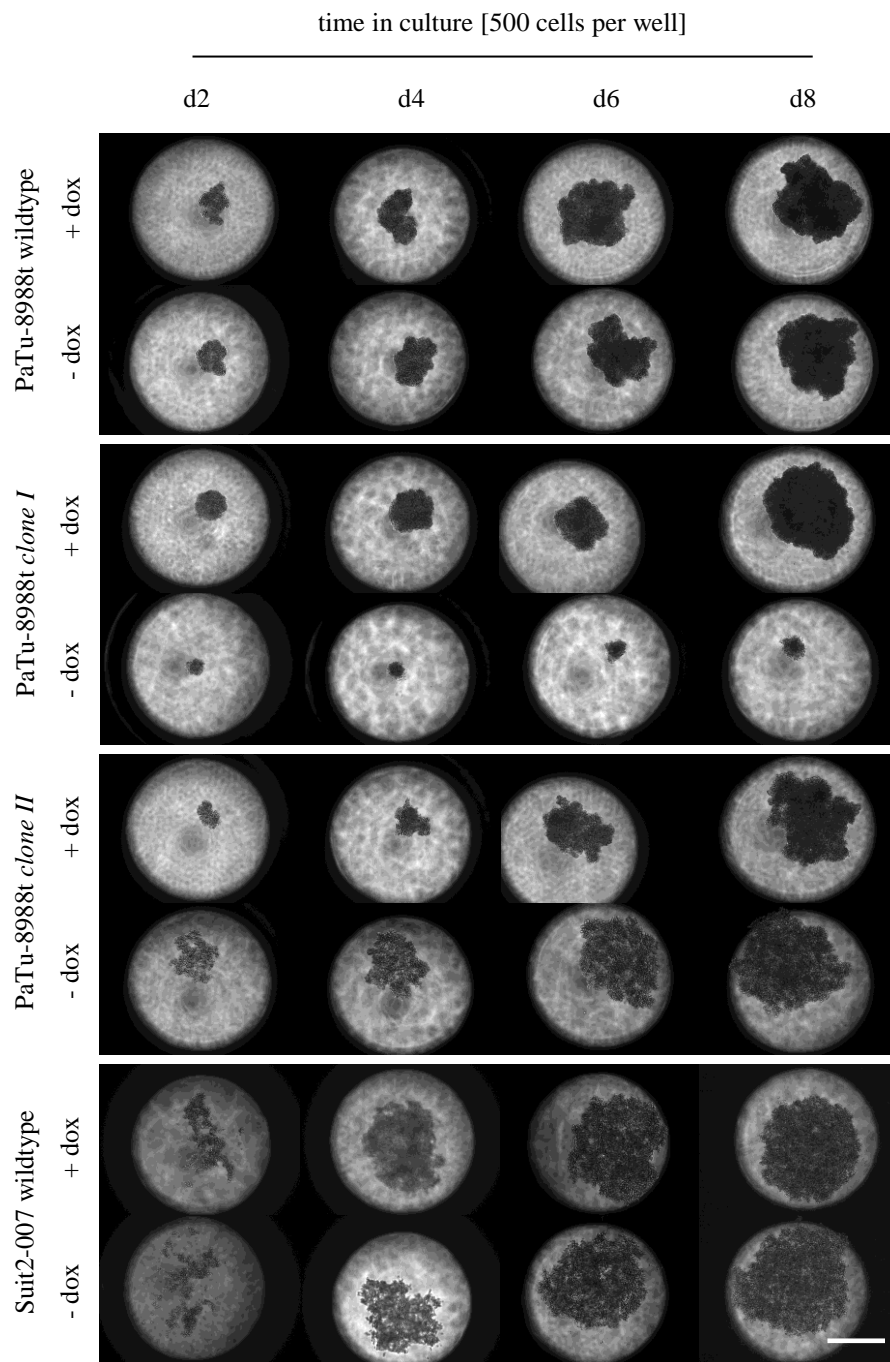

Fig. S2: Automated microscopic determination of growth kinetics of different PDAC cell lines in a density of 500 cells per well w/o doxycycline on day 2, 4, 6 and 8 after seeding using the LO-method. Bar – 500  $\mu$ m.
